# Supplementary material for: Measuring the diversity gap of cannabis clinical trial participants compared to people who report using cannabis
Source: Sci Rep. 2023 Jun 16;13:9787. doi: 10.1038/s41598-023-36770-5 (PMC10276002; doi:10.1038/s41598-023-36770-5)
Supplement: Supplementary file 1 — Supplementary Tables. [file 41598_2023_36770_MOESM1_ESM.docx]

**Measuring the diversity gap of cannabis clinical trial participants compared to people who report using cannabis**

**Heather Barkholtz**1, 2, * and **Maia Bates**1, 3

1Forensic Toxicology, Environmental Health Division, Wisconsin State Laboratory of Hygiene, 2601 Agriculture Dr., Madison, WI 53718, USA

2Pharmaceutical Sciences, School of Pharmacy, University of Wisconsin-Madison, 777 Highland Ave., Madison, WI 53705, USA

3Department of Chemistry, College of Letters of Science, University of Wisconsin-Madison, 1101 University Ave., Madison, WI 53706, USA

*Corresponding author: phone: (608) 890-1967, email: [hbarkholtz@wisc.edu](mailto:hbarkholtz@wisc.edu)

**Table S1**. Demographic characteristics of study population by cannabis use in the United States, 2021. Prevalence is the weighted count of “past-month” cannabis use divided by the weighted count of the population subgroup surveyed (displayed in parenthesis in the characteristic column). Distribution is the weighted count of “past-month” cannabis use divided by the weighted count of overall “past-month” cannabis use (here: 36,172,820). Prevalence and distribution estimates include 95% confidence intervals (CI).

| **Characteristic (Weighted total)** | **Past-month cannabis use** | | |
| --- | --- | --- | --- |
| **Weighted Count** | **Prevalence (CI), %** | **Distribution (CI), %** |
| Overall (279,843,944) | 36,172,820 | 12.93 (12.22-13.66) | --- |
| Male (136,763,692) | 20,471,904 | 14.97 (13.84-16.17) | 56.59 (54.52-58.64) |
| Female (143,080,251) | 15,700,917 | 10.97 (10.34-11.64) | 43.41 (41.36-45.48) |
| **Race/ethnicity** | | | |
| White (171,099,411) | 23,206,004 | 13.56 (12.66-14.52) | 64.15 (61.85-66.39) |
| Male (84,158,445) | 12,861,131 | 15.28 (13.75-16.95) | 35.55 (33.05-38.14) |
| Female (86,940,967) | 10,344,873 | 11.90 (11.10-12.74) | 28.60 (26.70-30.57) |
| Black (34,267,092) | 5,157,148 | 15.05 (13.57-16.66) | 14.26 (12.54-16.17) |
| Male (15,901,614) | 2,953,845 | 18.58 (16.16-21.26) | 8.17 (7.05-9.44) |
| Female (18,365,478) | 2,203,303 | 12.00 (10.59-13.56) | 6.09 (5.22-7.10) |
| Native American/Alaskan Native (1,772,091) | 486,494 | 27.45 (20.10-36.28) | 1.34 (0.94-1.91) |
| Native Hawaiian/Other Pacific Islander (1,099,568) | 175,609 | 15.97 (9.97-24.60) | 0.49 (0.29-0.82) |
| Asian (16,344,245) | 894,816 | 5.47 (4.18-7.14) | 2.47 (1.88-3.25) |
| More than one race (5,479,187) | 1,138,982 | 20.79 (17.40-24.64) | 3.15 (2.50-3.95) |
| Hispanic (49,782,349) | 5,113,767 | 10.27 (9.10-11.58) | 14.14 (12.59-15.84) |
| Male (24,942,345) | 3,136,974 | 12.58 (10.68-14.75) | 8.67 (7.40-10.14) |
| Female (24,840,005) | 1,976,793 | 7.96 (6.97-9.07) | 5.46 (4.82-6.19) |
| **Age Groups** | | | |
| 12-17 (26,019,281) | 1,478,621 | 5.68 (5.00-6.46) | 4.09 (3.55-4.71) |
| Male (13,288,095) | 683,384 | 5.14 (4.24-6.23) | 1.89 (1.55-2.30) |
| Female (12,731,187) | 795,237 | 6.25 (5.25-7.42) | 2.20 (1.78-2.71) |
| 18-25 (33,458,433) | 8,113,395 | 24.25 (22.88-25.67) | 22.43 (21.01-23.91) |
| Male (16,723,779) | 4,364,411 | 26.10 (23.89-28.43) | 12.07 (10.95-13.28) |
| Female (16,734,654) | 3,748,983 | 22.40 (20.83-24.05) | 10.36 (9.54-11.26) |
| 26-34 (40,161,932) | 8,841,625 | 22.01 (20.35-23.78) | 24.44 (22.58-26.41) |
| 35-49 (62,187,800) | 8,707,700 | 14.00 (12.70-15.42) | 24.07 (22.07-26.20) |
| 50-64 (62,856,466) | 6,385,496 | 10.16 (8.74-11.78) | 17.65 (15.43-20.12) |
| 65 + (55,160,031) | 2,645,983 | 4.80 (3.91-5.87) | 7.31 (6.01-8.88) |

**Table S2**. Linear regression analysis detailed results of cannabis use trends from 2002 through 2021. Residual standard error is the standard deviation of the residuals and R2 is the coefficient of determination of the linear regression. A right-tailed F-test yielded the F-statistic (F) and p-value (p). Linear regression models include slope (β), y-intercept (α), and their standard errors.

| **Population Subgroup** | **Residual standard error** | **R2** | **F** | **p** | **β** | **β standard error** | **α** | **α standard error** |
| --- | --- | --- | --- | --- | --- | --- | --- | --- |
| **Age Groups** | | | | | | | | |
| 12-17 | 0.5761 | 0.3165 | 8.337 | 0.009811 | -0.06450 | 0.02234 | 136.8 | 44.94 |
| 18-25 | 0.7955 | 0.9015 | 164.8 | < 0.001 | 0.3961 | 0.03085 | -777.3 | 62.06 |
| 26-34 | 1.475 | 0.8818 | 134.3 | < 0.001 | 0.6625 | 0.05718 | -1320 | 115.0 |
| 35-49 | 1.517 | 0.7337 | 49.60 | < 0.001 | 0.4143 | 0.05883 | -826.2 | 118.3 |
| 50-64 | 0.6644 | 0.9277 | 192.4 | < 0.001 | 0.4562 | 0.03289 | -913.2 | 66.21 |
| 65 + | 0.5253 | 0.8635 | 94.88 | < 0.001 | 0.2533 | 0.02601 | -508.4 | 52.35 |
| **Combined Race and Sex Groups** | | | | | | | | |
| White male | 0.885 | 0.8561 | 107.1 | < 0.001 | 0.3566 | 0.03446 | -706.9 | 69.31 |
| White female | 1.135 | 0.7616 | 57.39 | < 0.001 | 0.3335 | 0.04403 | -664.8 | 88.57 |
| Black male | 1.250 | 0.7801 | 63.85 | < 0.001 | 0.3874 | 0.04848 | -766.3 | 97.52 |
| Black female | 1.056 | 0.8444 | 97.68 | < 0.001 | 0.4046 | 0.04094 | -806.9 | 82.34 |
| Hispanic male | 0.8131 | 0.8549 | 106.0 | < 0.001 | 0.3246 | 0.03153 | -644.8 | 63.42 |
| Hispanic female | 0.6197 | 0.8828 | 135.5 | < 0.001 | 0.2798 | 0.02403 | -558.1 | 48.34 |

**Table S3**. NSDUH 2021 respondent demographics. Actual sample size is the raw number of completed interviews. Weighted sample and its standard error are population estimates.

| **Characteristic** | **Actual Sample Size** | **Weighted Sample** | **Weighted Sample Standard Error** |
| --- | --- | --- | --- |
| Total Responses | 69,850 | 279,843,944 | 5,072,751.7 |
| Male | 31,873 | 136,763,692 | 2,636,349.1 |
| Female | 37,977 | 143,080,251 | 2,791,278.8 |
| **Not Hispanic or Latino** | | | |
| White | 43,465 | 171,099,411 | 3,004,717.1 |
| Black or African American | 7,796 | 34,267,092 | 1,232,300.3 |
| Asian | 7,148 | 16,344,245 | 707,623.5 |
| AIAN | 1,772,091 | 185,383.0 |
| NHOPI | 1,099,568 | 183,154.9 |
| Two or More Races | 5,479,187 | 343,329.2 |
| Hispanic or Latino | 11,441 | 49,782,349 | 2,646,966.4 |

**Table S4**. Summary of clinical trial participant demographic characteristics by various literature groupings. All included works were divided into subgroups including: those published in 2000-2014, those published in 2015-2022, those including healthy participants with prior cannabis experience, and those including healthy participants with prior cannabis experience which were published from 2015-2022. Additionally, the summary of all works was included as 2000-2022 (*all works*) in bold for comparative purposes.

| **Participant Sex** | | | | | | | | | | | |
| --- | --- | --- | --- | --- | --- | --- | --- | --- | --- | --- | --- |
| **Condition** | **Total N** | | **Men (%)** | | | | **Women (%)** | | | | |
| **2000-2022 (*all works*)** | **967** | | **67.7** | | | | **32.3** | | | | |
| 2000-2014 | 187 | | 77.0 | | | | 23.0 | | | | |
| 2015-2022 | 780 | | 65.0 | | | | 35.0 | | | | |
| Prior cannabis exposure | 715 | | 72.3 | | | | 27.7 | | | | |
| Prior cannabis exposure + 2015-2022 | 545 | | 69.6 | | | | 30.1 | | | | |
| **Participant Race and Ethnicity** | | | | | | | | | | | |
| **Condition** | **Total N** | **Race Reported N** | **White (%)** | **Black (%)** | **Asian (%)** | | **> 1 race (%)** | **NA (%)** | | **Other (%)** | **Hispanic (%)** |
| **2000-2022 (*all works*)** | **967** | **377** | **83.0** | **6.4** | **2.4** | | **3.2** | **0.5** | | **0.8** | **3.7** |
| 2000-2014 | 187 | 39 | 100.0 | --- | --- | | --- | --- | | --- | --- |
| 2015-2022 | 780 | 338 | 81.1 | 7.1 | 2.7 | | 3.6 | 0.6 | | 0.9 | 4.1 |
| Prior cannabis exposure | 715 | 217 | 78.3 | 7.8 | 3.2 | | 4.1 | 0.5 | | 1.4 | 4.6 |
| Prior cannabis exposure, 2015-2022 | 545 | 187 | 74.9 | 9.1 | 3.7 | | 4.8 | 0.5 | | 1.6 | 5.3 |
| **Participant Age Ranges** | | | | | | | | | | | |
| **Condition** | **Total N** | **Minimum age range** | **Average minimum age** | | | **Maximum age range** | | | **Average maximum age** | | |
| **2000-2022 (*all works*)** | **967** | **15-52** | **23.9** | | | **25-79** | | | **44.3** | | |
| 2000-2014 | 187 | 18-42 | 22.8 | | | 29-73 | | | 44.5 | | |
| 2015-2022 | 780 | 15-52 | 24.4 | | | 25-79 | | | 44.2 | | |
| Prior cannabis exposure | 715 | 15-29 | 20.8 | | | 25-52 | | | 37.4 | | |
| Prior cannabis exposure + 2015-2022 | 545 | 15-29 | 21.2 | | | 25-52 | | | 35.7 | | |
